# Supplementary material for: Facile synthesis of Er3+/Yb3+-codoped NaYF4 nanoparticles: a promising multifunctional upconverting luminescent material for versatile applications
Source: Royal Society of Chemistry journal article supplement (doi:10.1039/c6ra22349d), 2016-01-01
Supplement: c6ra22349d1.pdf [file c6ra22349d1.pdf]

# Facile synthesis of Er<sup>3+</sup>/Yb<sup>3+</sup>-codoped NaYF<sub>4</sub> nanoparticles: A promising multifunctional upconverting luminescent material for versatile applications

Peng Du<sup>a</sup>, Laihui Luo<sup>b\*</sup> and Jae Su Yu<sup>a\*</sup>

<sup>a</sup>Department of Electronics and Radio Engineering, Kyung Hee University, Yongin 446-701, Republic of Korea

<sup>b</sup>Department of Microelectronic Science and Engineering, Ningbo University, 315211 Ningbo, China

\* Corresponding author:

Tel: 82 31 201 3820;

Fax: 82 31 206 2820.

E-mail address: luolaihui@nbu.edu.cn (L. Luo); jsyu@khu.ac.kr (J. S. Yu)

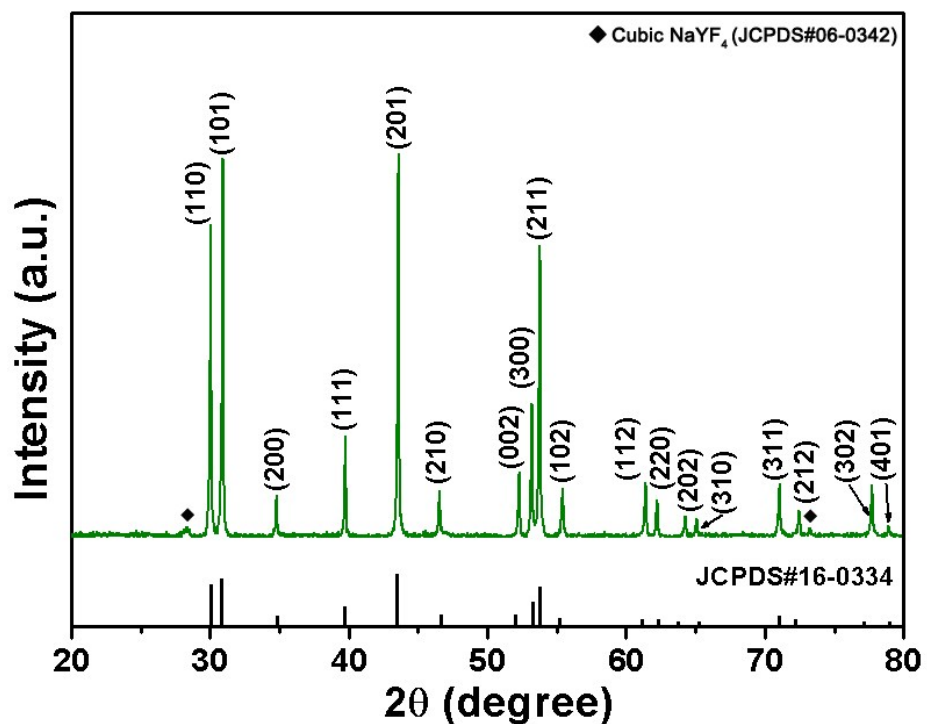

**Figure S1** XRD pattern of the NaYF<sub>4</sub>:Er<sup>3+</sup>/Yb<sup>3+</sup> nanoparticles. The diffraction peaks of the cubic phase were marked as ◆.

**Table S1.** Refined structural parameters for the NaYF<sub>4</sub>:Er<sup>3+</sup>/Yb<sup>3+</sup> nanoparticles.

| Sample           | NaYF <sub>4</sub> :Er <sup>3+</sup> /Yb <sup>3+</sup> |
|------------------|-------------------------------------------------------|
| Phase structure  | Hexagonal                                             |
| Space group      | P63/m(176)                                            |
| $a = b$          | 5.932823 (Å)                                          |
| $c$              | 3.482378 (Å)                                          |
| $\alpha = \beta$ | 90°                                                   |
| $\gamma$         | 120°                                                  |
| $V$              | 106.152 (Å <sup>3</sup> )                             |
| $R_p$            | 9.38%                                                 |
| $R_{wp}$         | 12.58%                                                |
| $\chi^2$         | 0.891                                                 |

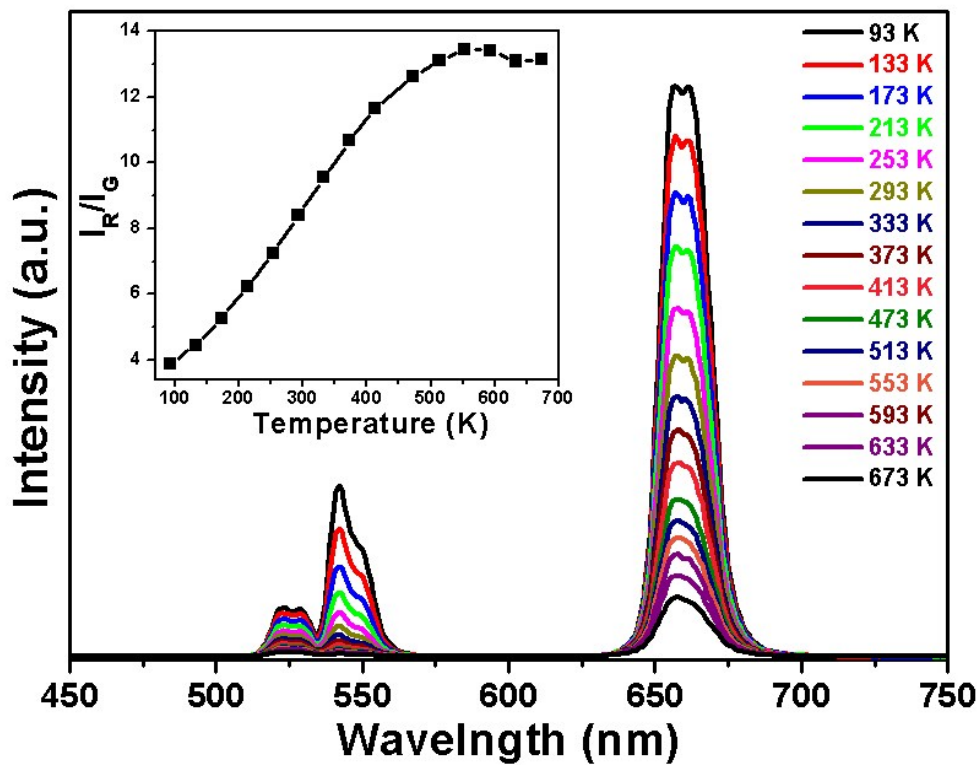

**Figure S2.** UC emission spectra of the NaYF<sub>4</sub>:Er<sup>3+</sup>/Yb<sup>3+</sup> nanoparticles excited at 980 nm of light in the temperature range of 93-673 K. Inset shows the dependence of I<sub>R</sub>/I<sub>G</sub> ratio on temperature.

**Table S2.** CIE chromaticity coordinates of the NaYF<sub>4</sub>:Er<sup>3+</sup>/Yb<sup>3+</sup> nanoparticles at different temperatures.

| Temperature (K) | CIE color coordinates |          | Excitation wavelength (nm) |
|-----------------|-----------------------|----------|----------------------------|
|                 | <i>x</i>              | <i>y</i> |                            |
| 93              | 0.446                 | 0.543    | 980                        |
| 133             | 0.462                 | 0.527    | 980                        |
| 173             | 0.481                 | 0.508    | 980                        |
| 213             | 0.501                 | 0.488    | 980                        |
| 253             | 0.520                 | 0.469    | 980                        |
| 293             | 0.537                 | 0.452    | 980                        |
| 333             | 0.552                 | 0.437    | 980                        |
| 373             | 0.565                 | 0.425    | 980                        |
| 413             | 0.575                 | 0.415    | 980                        |
| 473             | 0.584                 | 0.406    | 980                        |
| 513             | 0.588                 | 0.401    | 980                        |
| 553             | 0.590                 | 0.399    | 980                        |
| 593             | 0.591                 | 0.398    | 980                        |
| 633             | 0.588                 | 0.400    | 980                        |
| 673             | 0.588                 | 0.399    | 980                        |

**Table S3.** Calculated temperature and the corresponding FIR values for the NaYF<sub>4</sub>:Er<sup>3+</sup>/Yb<sup>3+</sup> nanoparticles at different pump powers.

| Pump power (mW) | FIR value | Temperature (K) | Excitation wavelength (nm) |
|-----------------|-----------|-----------------|----------------------------|
| 84              | 0.534     | 255.03          | 980                        |
| 172             | 0.608     | 283.82          | 980                        |
| 260             | 0.705     | 318.74          | 980                        |
| 377             | 0.781     | 345.06          | 980                        |
| 585             | 0.860     | 372.03          | 980                        |
